# Supplementary material for: Atomic layer deposited films of Al2O3 on fluorine-doped tin oxide electrodes: stability and barrier properties
Source: publisher site journal article supplement (doi:10.3762/bjnano.12.2), 2021-01-05
Supplement: Additional file 1 [file 2190-4286-12-2-S1.pdf]

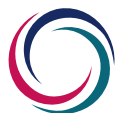

## Supporting Information

for

### **Atomic layer deposited films of Al<sub>2</sub>O<sub>3</sub> on fluorine-doped tin oxide electrodes: stability and barrier properties**

Hana Krýsová, Michael Neumann-Spallart, Hana Tarábková, Pavel Janda,  
Ladislav Kavan and Josef Krýsa

*Beilstein J. Nanotechnol.* **2021**, *12*, 24–34. [doi:10.3762/bjnano.12.2](https://doi.org/10.3762/bjnano.12.2)

## Additional figures

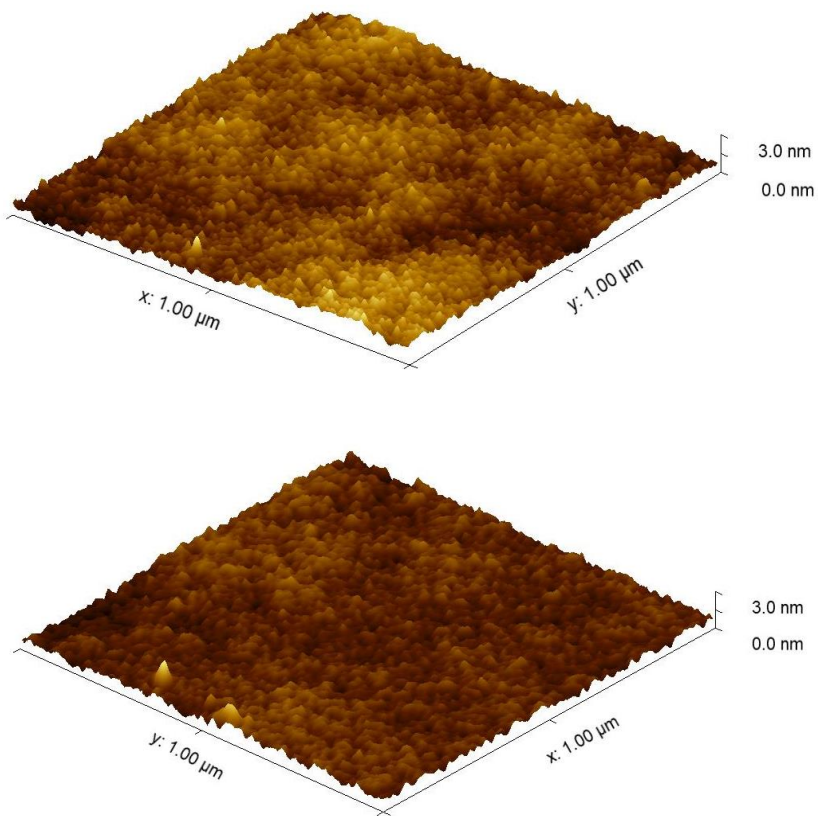

**Figure S1:** AFM surface morphology of Si/SiO<sub>2</sub> (bottom) and Si/SiO<sub>2</sub> coated with 17 nm Al<sub>2</sub>O<sub>3</sub> (top).

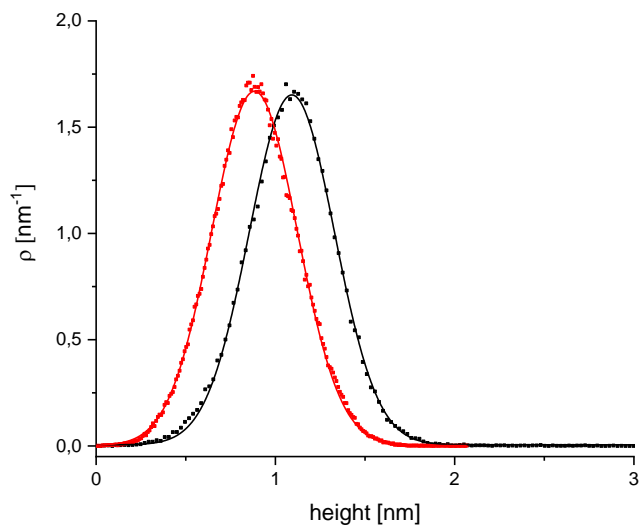

**Figure S2:** Height-density distribution calculated from AFM topography images (1 μm × 1 μm) of Si/SiO<sub>2</sub> (black dots) and Si/SiO<sub>2</sub> coated with 17 nm Al<sub>2</sub>O<sub>3</sub> (red dots).

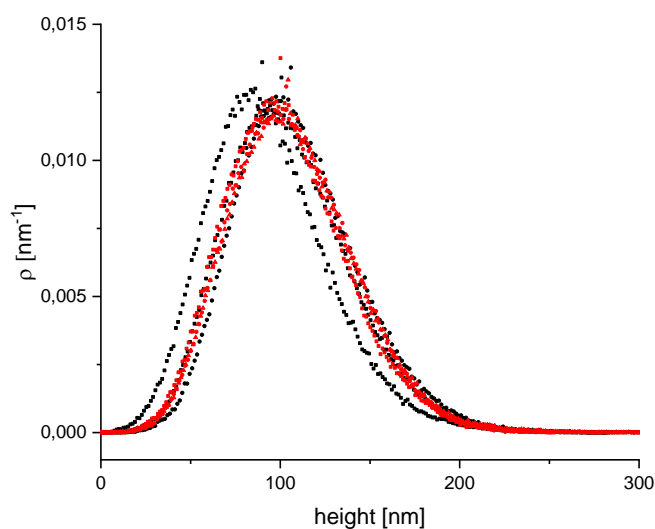

**Figure S3:** Height-density distribution calculated from AFM topography images ( $10 \mu\text{m} \times 10 \mu\text{m}$ ) of three locations on the FTO substrate (black dots) and on FTO coated by 17 nm  $\text{Al}_2\text{O}_3$  (red dots).

The effective pinhole area (EPA), defined as a ratio of  $A_u$  to  $A_0$ , can be expressed as ratio of  $j_p$  to  $j_{p,\text{FTO}}$ , where  $j_p$  is the peak current density (with reference to the projected electrode area,  $A_0$ ) measured at the actual blocking electrode.  $A_u$  is the uncovered area of FTO and  $j_{p,\text{FTO}}$  is the current density peak measured at a bare FTO electrode. As suggested in previous works [1,2], there are two types of defects in the barrier film: i) The “defect A”, in which the partially blocked electrode behaves like “clean” FTO but with a relatively smaller effective area. The relative increase of the voltammetric peak separation ( $\Delta E_{pp}$ ) on the blocking layer normalized to that of pure FTO is smaller than three ( $\Delta E_{pp}$  is defined as the difference between the peak potential values for the  $\text{Fe}(\text{CN})_6^{4-}$  oxidation and  $\text{Fe}(\text{CN})_6^{3-}$  reduction). ii) The “defect B” is a more complex situation, in which the defect not only causes the delamination of the titania film from the FTO substrate, but also the slowdown of charge transfer kinetics (accompanied by a strong increase in  $\Delta E_{pp}$ ).

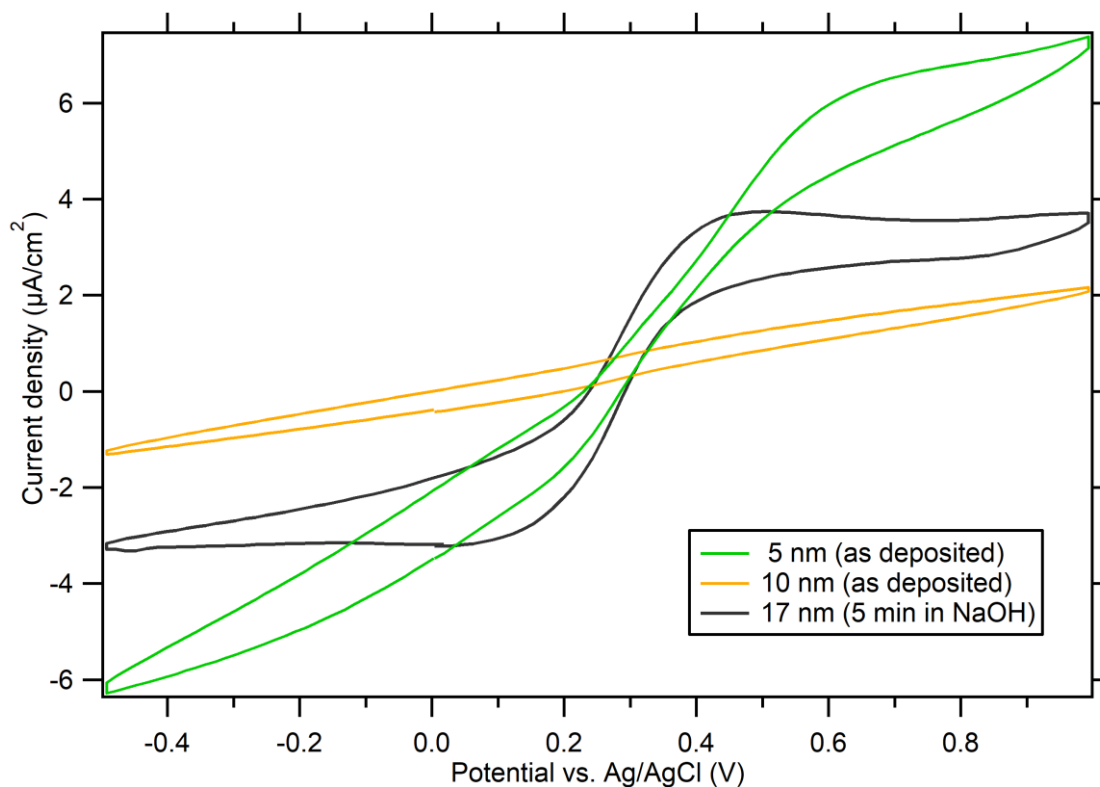

**Figure S4:** CVs of 0.5 mM  $\text{K}_3[\text{Fe}(\text{CN})_6]$  and 0.5 mM  $\text{K}_4[\text{Fe}(\text{CN})_6]$  in 0.5 M KCl, demonstrating the blocking properties of 5 and 10 nm  $\text{Al}_2\text{O}_3$  films on FTO electrodes compared to 17 nm  $\text{Al}_2\text{O}_3$  films on FTO, after an exposure to 1 M NaOH for 5 min. The scan rate is 50 mV/s.

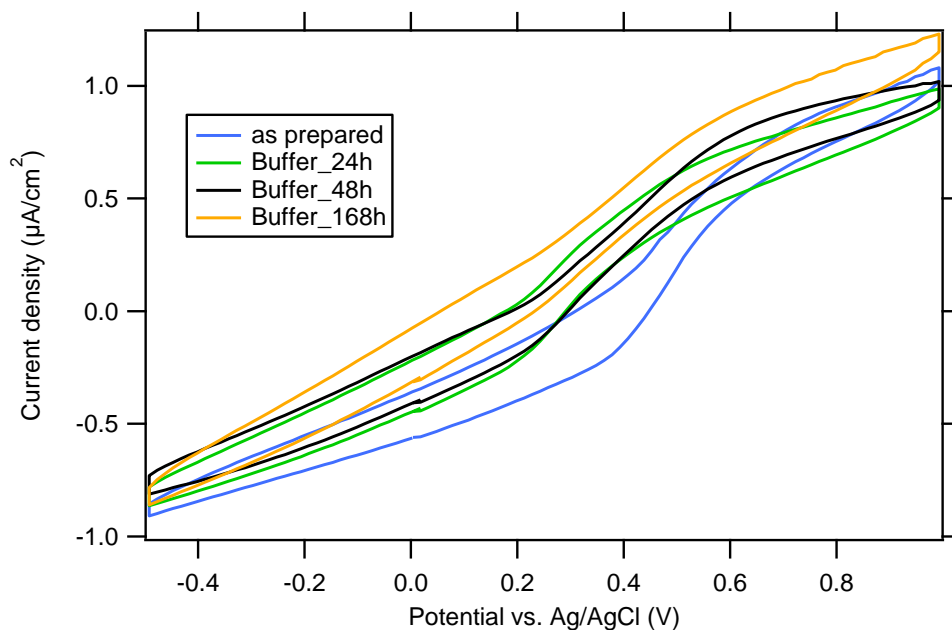

**Figure S5:** Details of the blocking properties of 17 nm  $\text{Al}_2\text{O}_3$  films before and after exposure to phosphate buffer (pH 7.2) for 24, 48, and 168 hours. Cycling voltammetry in the presence of 0.5 mM  $\text{K}_3[\text{Fe}(\text{CN})_6]$  and 0.5 mM  $\text{K}_4[\text{Fe}(\text{CN})_6]$  in 0.5 M KCl. The scan rate is 50 mV/s.

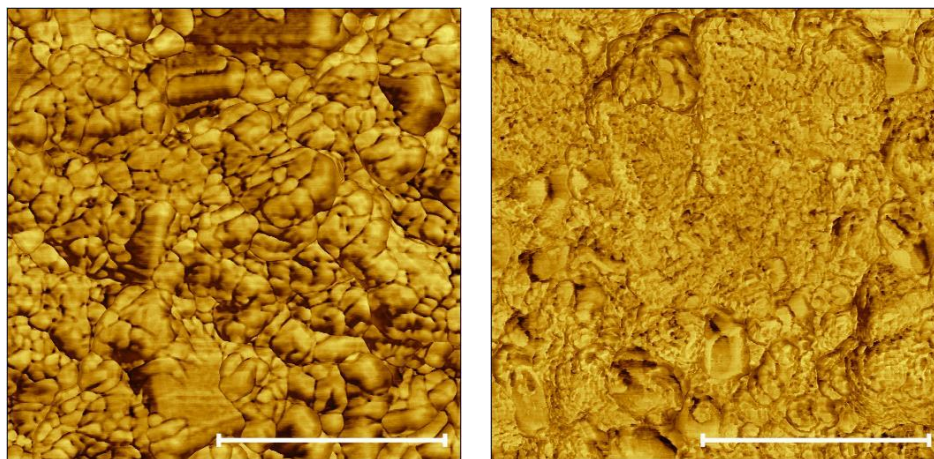

**Figure S6:** AFM phase image ( $1 \mu\text{m} \times 1 \mu\text{m}$ ) of an FTO substrate before (left) and after (right) electrochemical treatment ( $-1.2$  V, 5 h, phosphate buffer pH 7.2). White bars represent 500 nm.

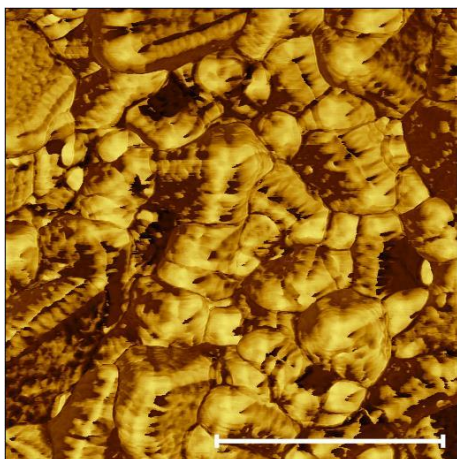

**Figure S7:** AFM phase image ( $1\ \mu\text{m} \times 1\ \mu\text{m}$ ) of FTO substrate with 10 nm  $\text{Al}_2\text{O}_3$  film after electrochemical treatment ( $-1.2\ \text{V}$ , 5 h, phosphate buffer, pH 7.2). The white bar represents 500 nm.

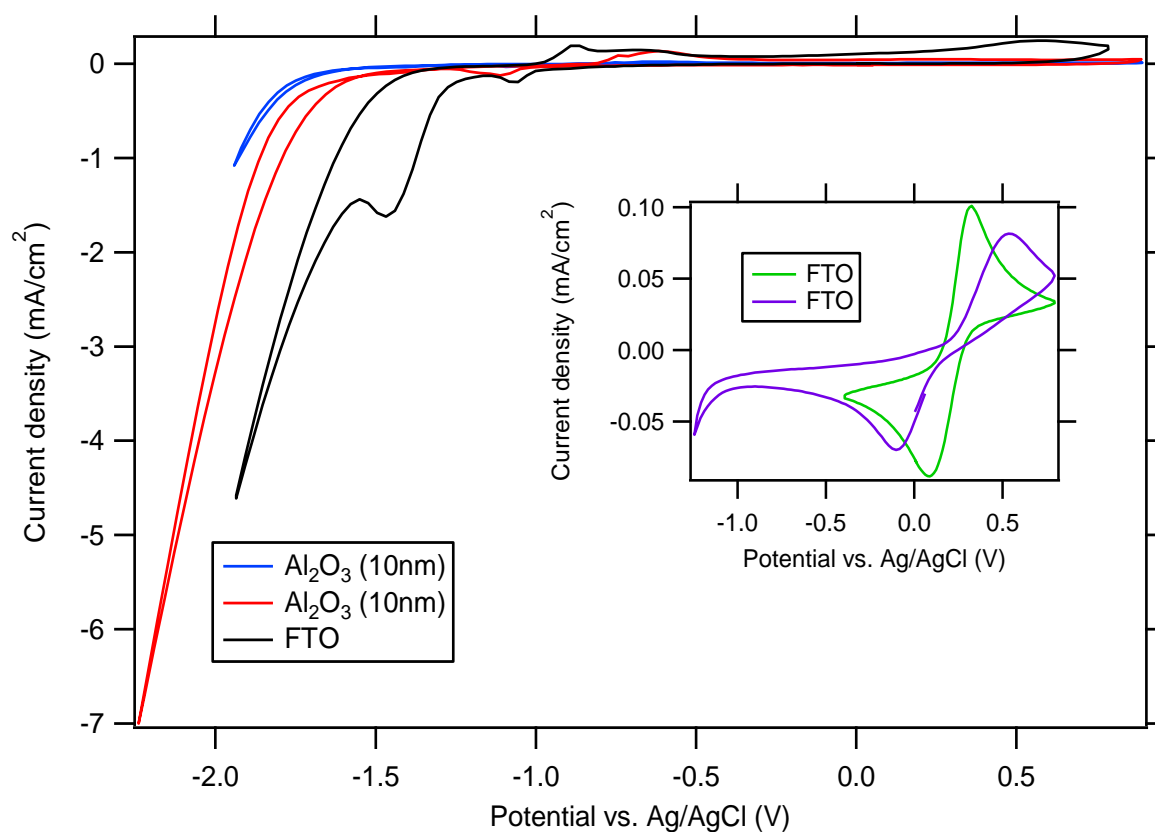

**Figure S8:** Cyclic voltammograms of  $0.5\ \text{mM}\ \text{K}_3[\text{Fe}(\text{CN})_6]$  and  $0.5\ \text{mM}\ \text{K}_4[\text{Fe}(\text{CN})_6]$  in phosphate buffer solution (pH 7.2) demonstrating a cathodic breakdown of FTO and its stabilization by coating with a 10 nm  $\text{Al}_2\text{O}_3$  film. Inset: details of voltammograms on blank FTO with two different cathodic vertex potentials. The scan rate is  $50\ \text{mV}/\text{s}$ .

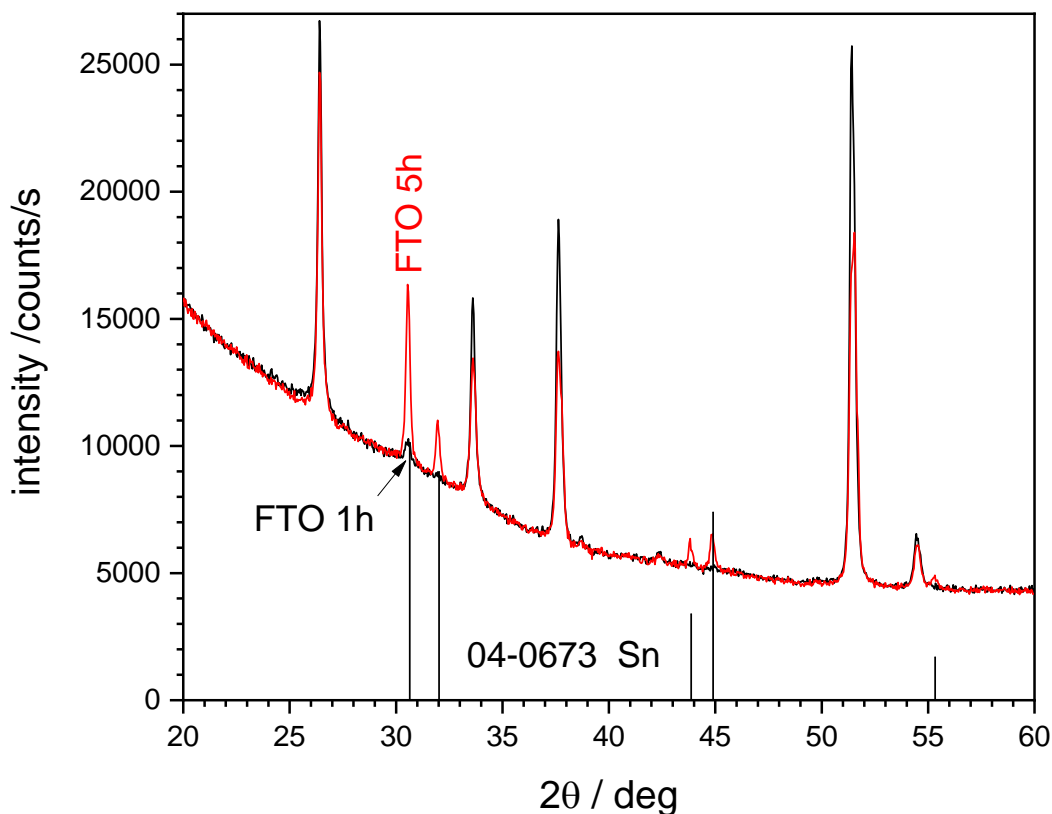

**Figure S9:** XRD patterns of unprotected FTO layers polarized at  $-1.2$  V vs Ag/AgCl in buffer (pH 7.2) for 1 and 5 h. The Sn pattern was obtained from [3].

## References

1. Kavan, L.; Tétreault, N.; Moehl, T.; Grätzel, M. *J. Phys. Chem. C* **2014**, *118*, 16408–16418. doi:[10.1021/jp4103614](https://doi.org/10.1021/jp4103614)
2. Krýsová, H.; Krýsa, J.; Kavan, L. *Beilstein J. Nanotechnol.* **2018**, *9*, 1135–1145. doi:[10.3762/bjnano.9.105](https://doi.org/10.3762/bjnano.9.105)
3. Powder Diffraction File Alphabetic PDF-2 Data Base, International Center of Diffraction Data, Newtown Square, PA, USA, 1994.
